# Supplementary material for: A DNA-Schiff base functional nanopore sensing platform for the highly sensitive detection of Al3+and Zn2+ions
Source: Royal Society of Chemistry journal article supplement (doi:10.1039/d2dt03786f), 2023-01-01
Supplement: d2dt03786f1.pdf [file d2dt03786f1.pdf]

## Electronic Supplementary Information (ESI)

### The DNA-Schiff Base Functional Nanopore Sensing Platform for Highly Sensitive Detection of $\text{Al}^{3+}$ and $\text{Zn}^{2+}$ ions

Shuailong Zhou<sup>a,#</sup>, Jianhan Ye<sup>b,c,#</sup>, Xiaohuan Zhao<sup>a</sup>, Zihao Zhou<sup>a</sup>, Yuanchen Dong<sup>c</sup>,  
Qian Shi,<sup>a,\*</sup> Nannan Liu,<sup>a,\*</sup> and Fen Wu,<sup>a,\*</sup>

<sup>a</sup>College of Chemistry and Materials Engineering, Wenzhou University, Wenzhou 325035, China

<sup>b</sup>Department of Chemistry, Renmin University of China, Beijing 100872, China

<sup>c</sup>Institute of Chemistry, Chinese Academy of Sciences, Beijing 100190, China

\* Indicates corresponding author

## **Table of Contents**

- 1. Ionic currents measurement device**
- 2. Synthesis and Characterization of F1**
- 3. TEM Characterization of DNA Nanocube and DNA Network**
- 4. SEM Characterization of the Glass Nanopipette and Electrochemical Measurement**
- 5. Fluorescent Measurement**

## 1. Ionic currents measurement device

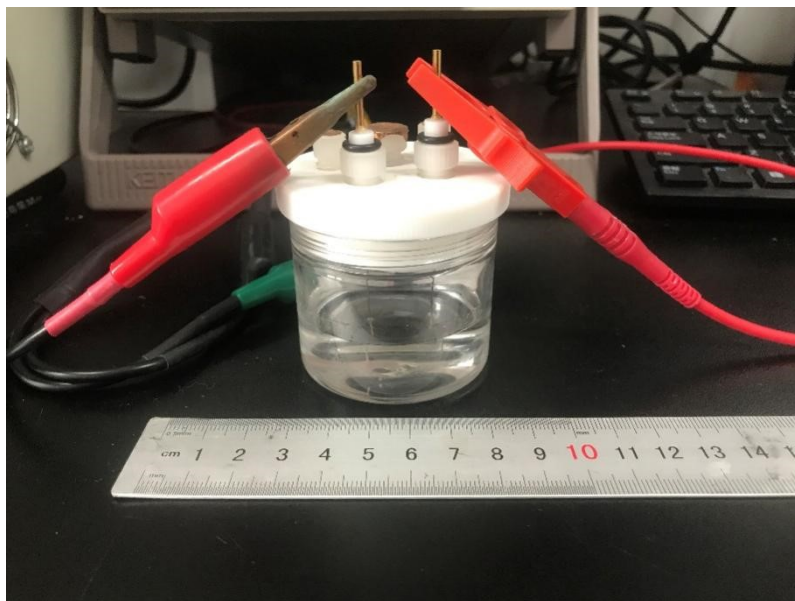

**Fig. S1** Ionic currents measurement device.

## 2. Synthesis and Characterization of F1

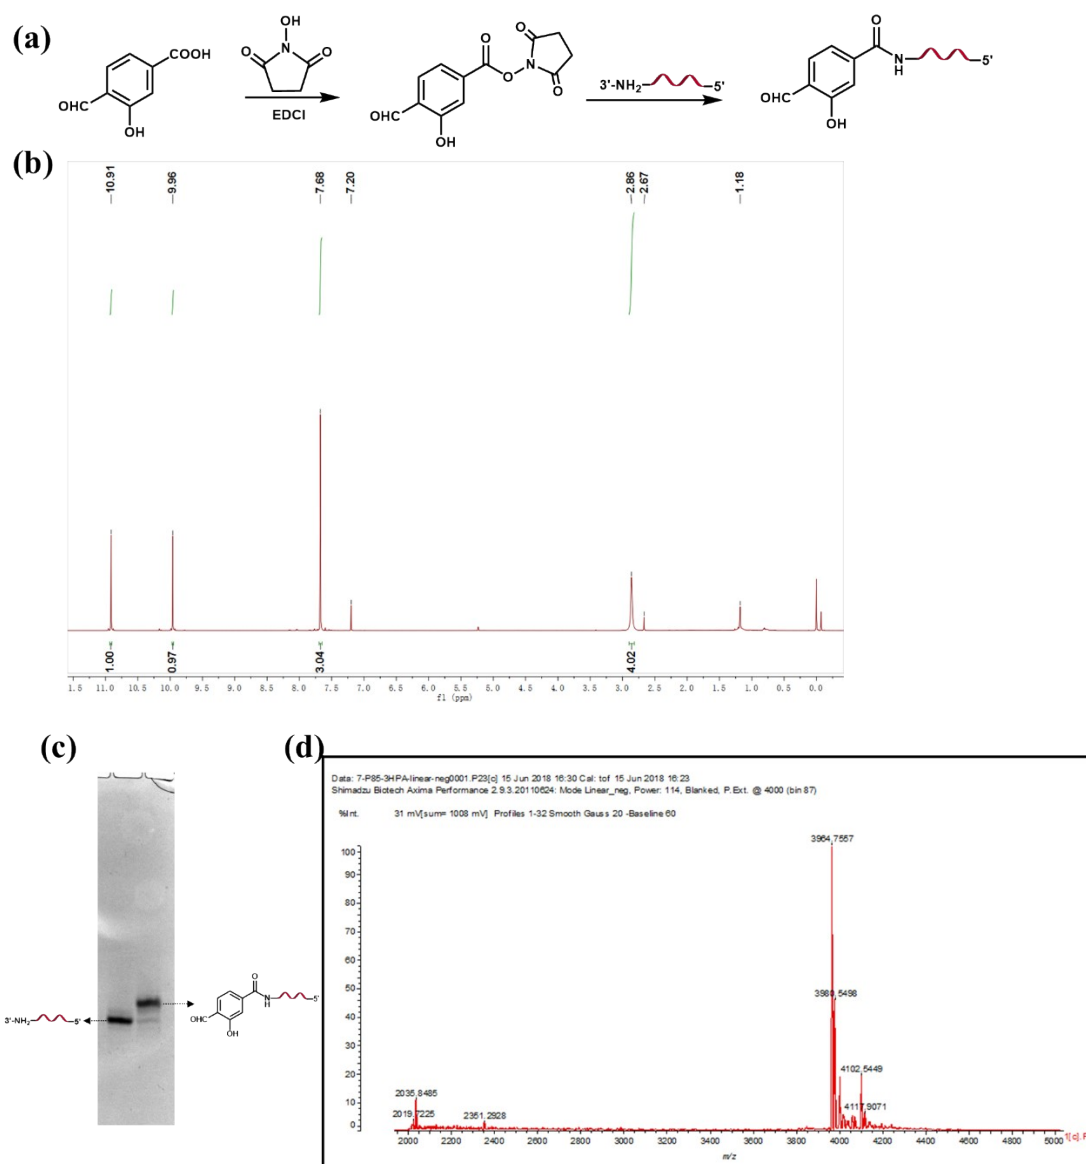

**Fig. S2** (a) Schematic synthesis of F1. (b) <sup>1</sup>H NMR spectra of 2,5-dioxopyrrolidin-1-yl 4-formyl-3-hydroxybenzoate. (c) F1 and raw DNA were characterized using 10% polyacrylamide gel electrophoresis in the native conditions. (d) Matrix-Assisted Laser Desorption/Ionization Time of Flight Mass Spectrometry (MALDI-TOF-MS) spectra of F1.

### 3. TEM Characterization of DNA Nanocube and DNA Network

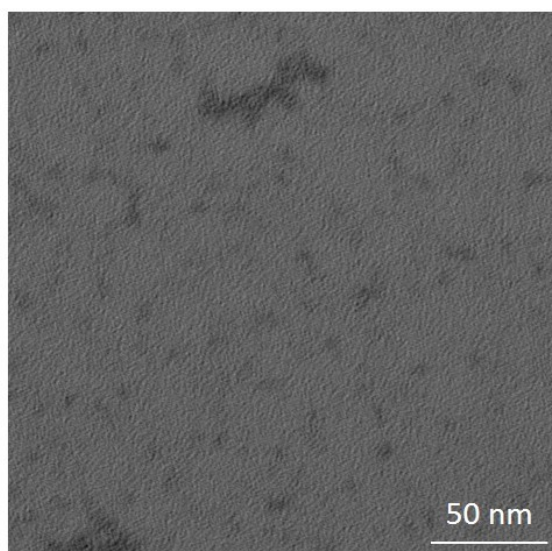

**Fig. S3** TEM image of DNA nanocube.

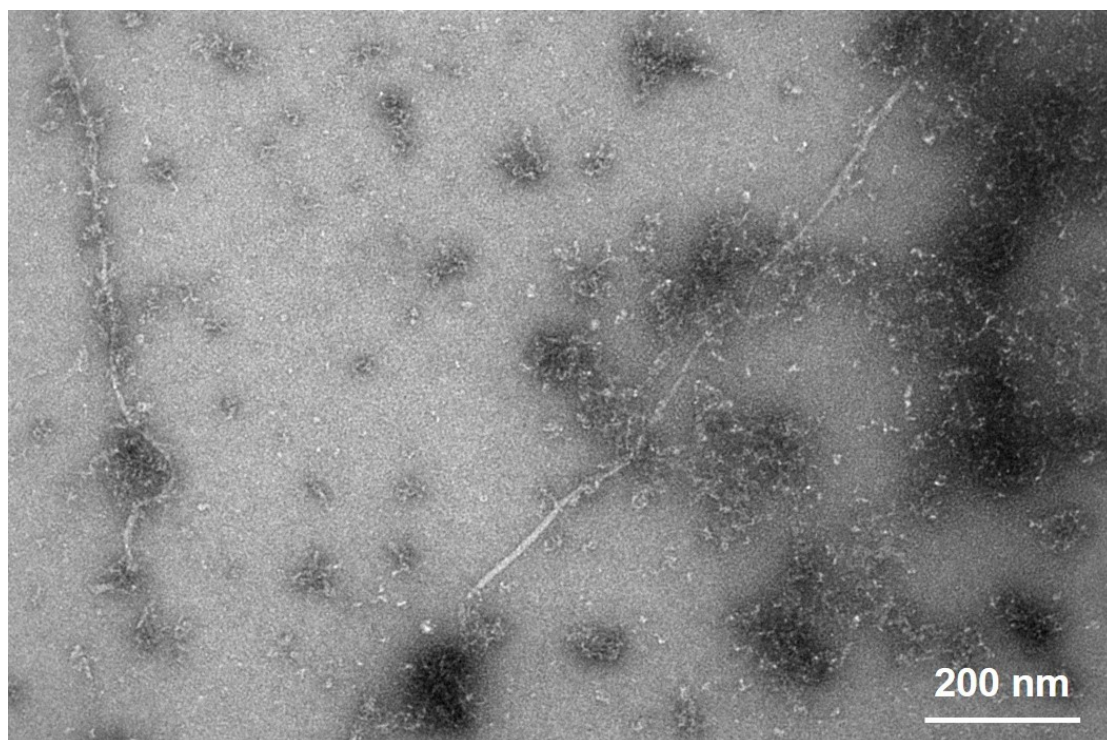

**Fig. S4** TEM image of the assemblies from two DNA cubes (cube+4L<sub>1</sub>, cube+4L<sub>2</sub>).

## 4. SEM Characterization of the Glass Nanopipette and Electrochemical Measurement

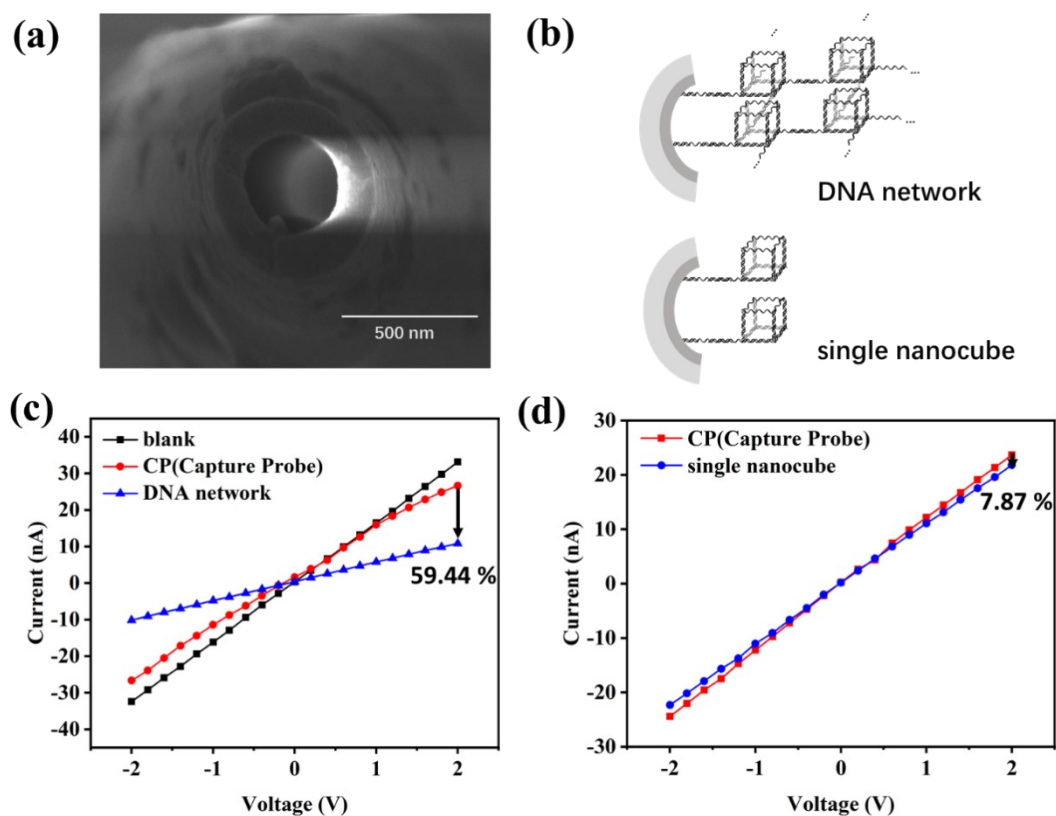

**Fig. S5** (a) SEM of blank GN. (b) The contrast diagram of DNA network and single nanocube modified in GN. (c) Corresponding I-V curves during GN modification of the DNA network (blank, CP (Capture Probe) and DNA network). (d) Corresponding I-V curves during GN modification of the single nanocube (CP (Capture Probe) and single nanocube).

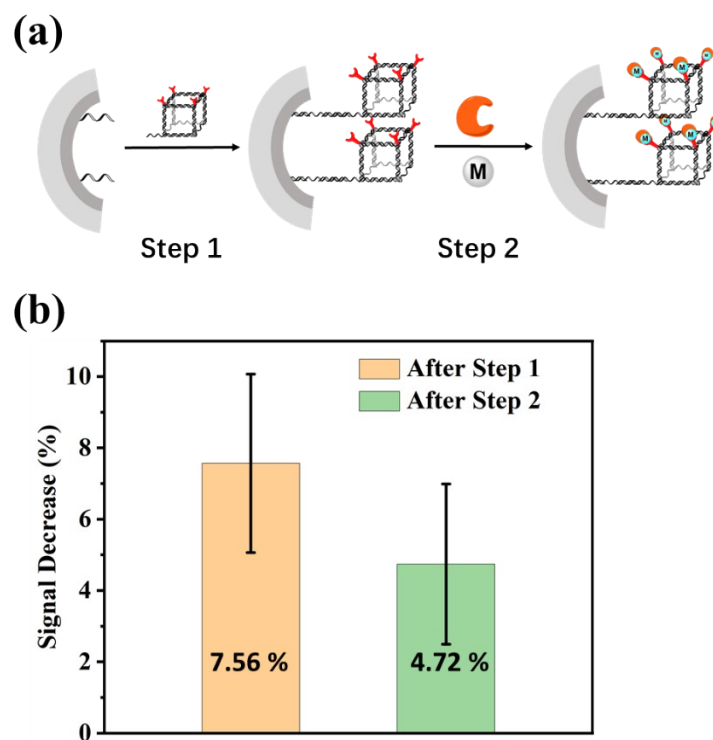

**Fig. S6** (a) Schematic diagram of F1-decorated DNA nanocube modification process and  $\text{Zn}^{2+}$  response in GN. (b) The corresponding current signal drop rate during the modification of F1-decorated DNA nanocube and  $\text{Zn}^{2+}$  response in GN ( $\text{Zn}^{2+}$ ,  $10^8$  fM; Tris-HCl, 10 mM, pH =7.4).

## 5. Fluorescent Measurement

(a)

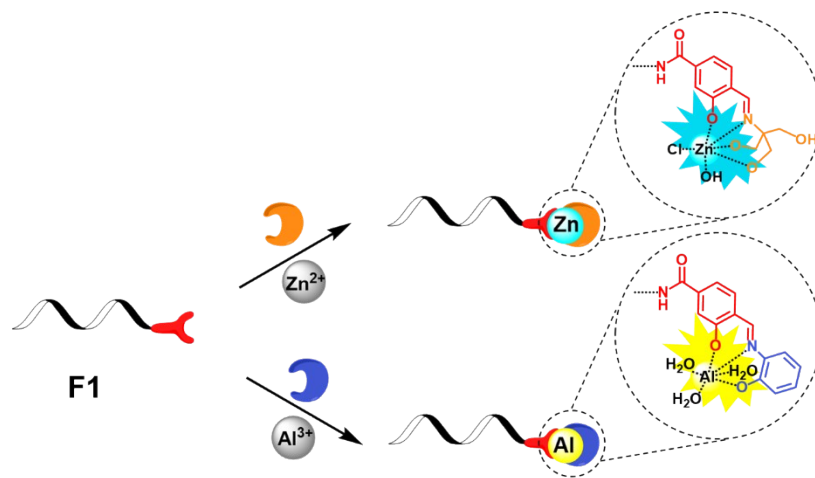

(b)

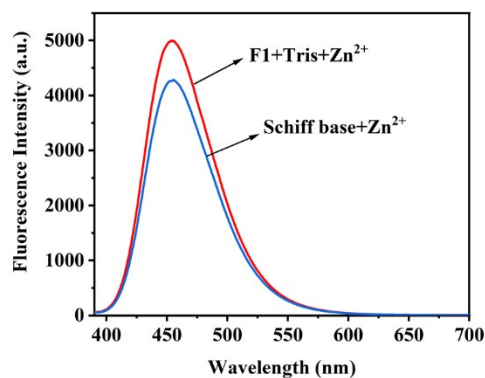

(c)

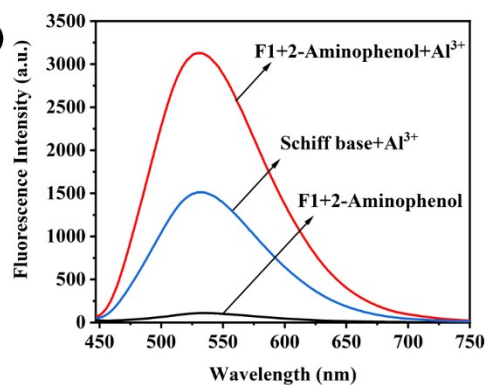

**Fig. S7** (a) The synthetic scheme of the functional DNA Schiff base fluorescent probe with the ability to capture different metal ions. (b) Fluorescence emission spectra of mixture of F1+Tris+Zn<sup>2+</sup> and mixture of Schiff base and Zn<sup>2+</sup>. (F1, 20  $\mu$ M; Tris 10 mM, pH = 7.4; Zn<sup>2+</sup> 200  $\mu$ M) (c) Fluorescence emission spectra of mixture of F1+2-aminophenol+Al<sup>3+</sup> and mixture of Schiff base and Al<sup>3+</sup> (F1, 20  $\mu$ M; 2-aminophenol, 10 mM; Al<sup>3+</sup> 200  $\mu$ M).



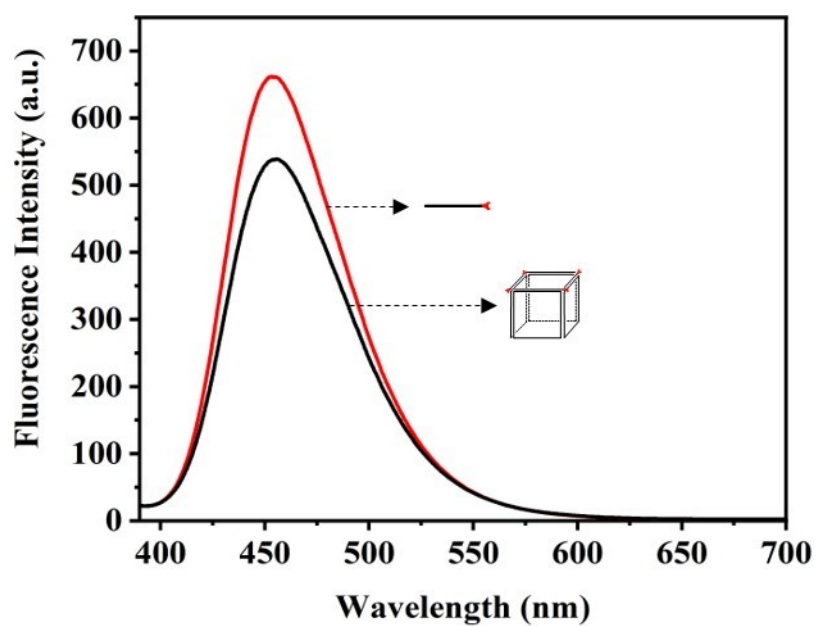

**Fig. S8** Fluorescence emission spectra obtained for 4F1 @cube+Tris (F1, 6.4  $\mu$ M; cube, 1.6  $\mu$ M; Tris-HCl, 10 mM, pH = 7.4) in aqueous solution after the addition of  $Zn^{2+}$  (64  $\mu$ M).
